# Supplementary material for: Identification of FEZ2 as a potential oncogene in pancreatic ductal adenocarcinoma
Source: PeerJ journal article supplement (doi:10.7717/peerj.12736), 2022-01-05

# Figure 1

## A

| Analysis Type by Cancer     | Cancer vs. Normal |      | Cancer vs. Normal |      |
|-----------------------------|-------------------|------|-------------------|------|
|                             | FEZ1              | FEZ2 | FEZ1              | FEZ2 |
| Bladder Cancer              | 1                 | 2    |                   |      |
| Brain and CNS Cancer        |                   | 4    |                   |      |
| Breast Cancer               | 5                 |      |                   | 1    |
| Cervical Cancer             |                   |      |                   |      |
| Colorectal Cancer           | 1                 |      |                   | 3    |
| Esophageal Cancer           | 2                 |      |                   |      |
| Gastric Cancer              |                   |      |                   |      |
| Head and Neck Cancer        | 4                 |      | 1                 |      |
| Kidney Cancer               |                   |      |                   |      |
| Leukemia                    |                   |      |                   | 3    |
| Liver Cancer                | 1                 |      |                   |      |
| Lung Cancer                 | 10                |      |                   | 3    |
| Lymphoma                    |                   |      | 3                 |      |
| Melanoma                    |                   |      |                   | 1    |
| Myeloma                     | 1                 |      |                   |      |
| Other Cancer                | 4                 |      |                   |      |
| Ovarian Cancer              | 1                 |      |                   | 2    |
| Pancreatic Cancer           |                   |      | 2                 |      |
| Prostate Cancer             | 1                 |      |                   |      |
| Sarcoma                     | 1                 | 1    |                   |      |
| Significant Unique Analyses | 9                 | 30   | 6                 | 13   |
| Total Unique Analyses       | 444               |      | 422               |      |

  

|   |   |    |    |   |   |
|---|---|----|----|---|---|
| 1 | 5 | 10 | 10 | 5 | 1 |
| █ | █ | █  | █  | █ | █ |
| ← | ← | ←  | ←  | ← | ← |
|   |   | %  |    |   |   |

## B

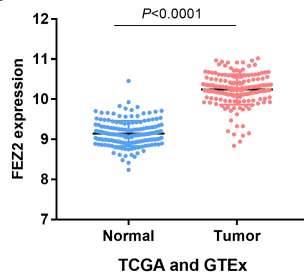

## C

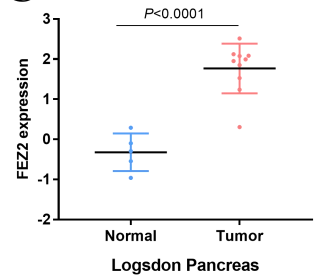

## D

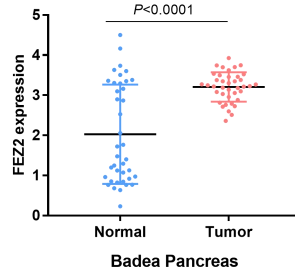

## E

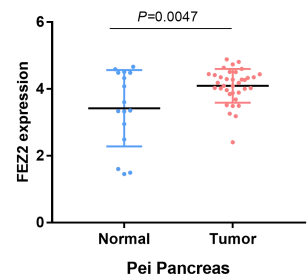

## F

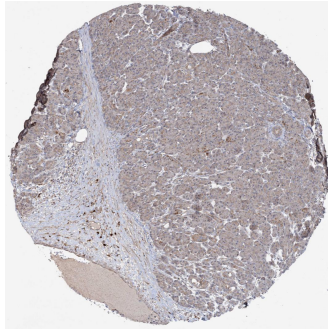

Pancreas (HPA035978)

Male, age 63  
 Exocrine glandular cells  
 Staining: **Medium**  
 Intensity: **Moderate**  
 Quantity: **>75%**  
 Islets of Langerhans  
 Staining: **Medium**  
 Intensity: **Moderate**  
 Quantity: **>75%**

## G

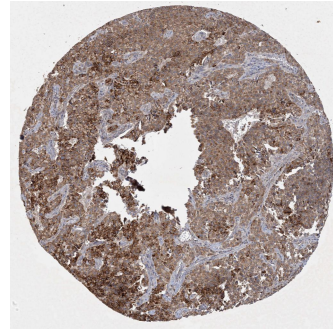

Pancreatic cancer (HPA035978)

Male, age 65  
 Tumor cells  
 Staining: **High**  
 Intensity: **Strong**  
 Quantity: **>75%**

## H

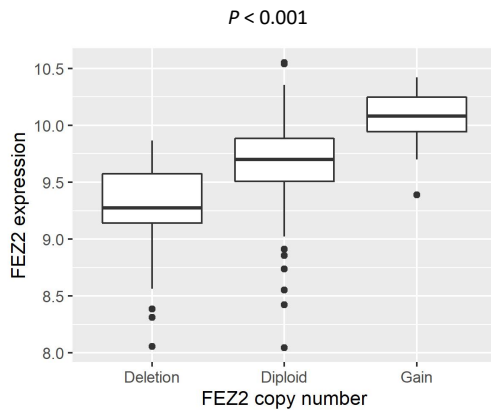

## I

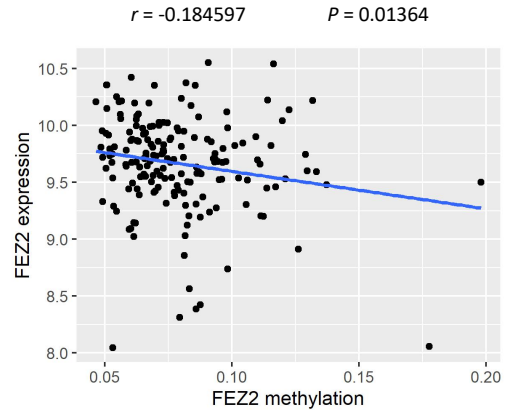

# Figure 2

## A

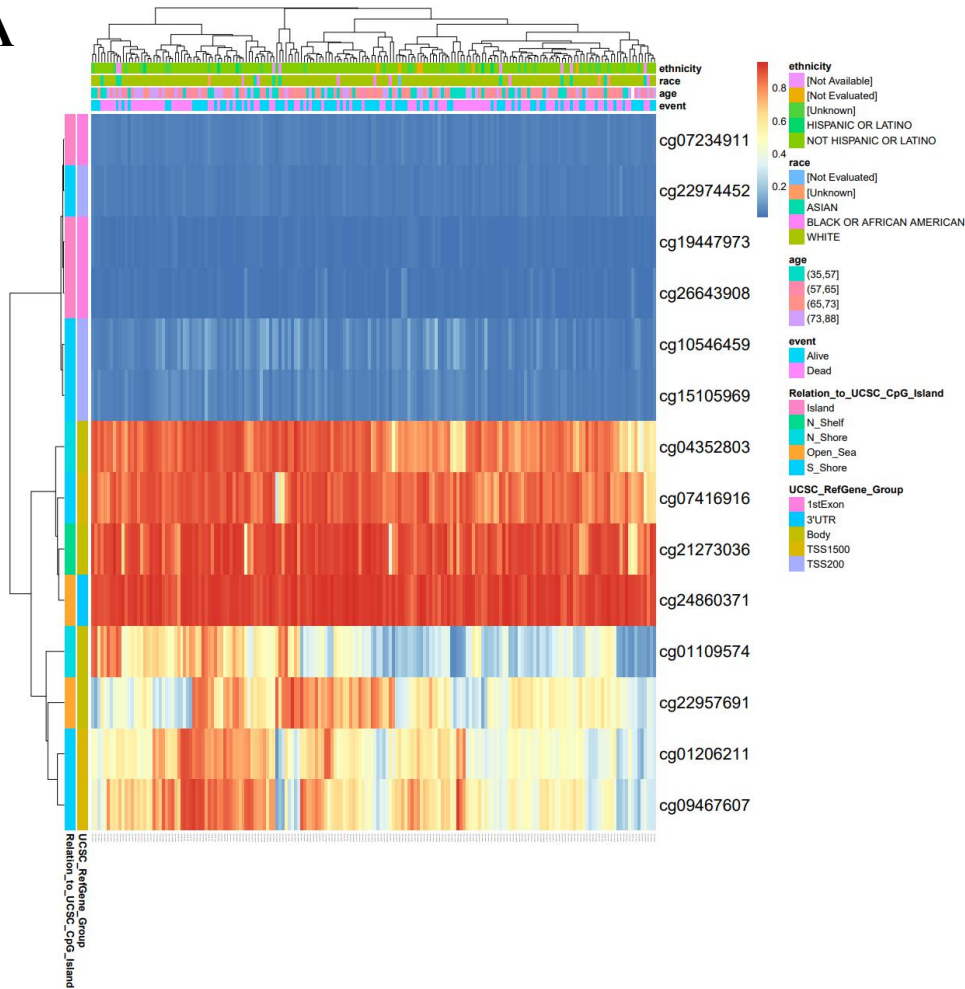

## B

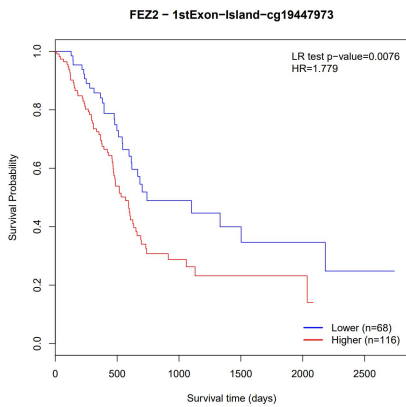

## C

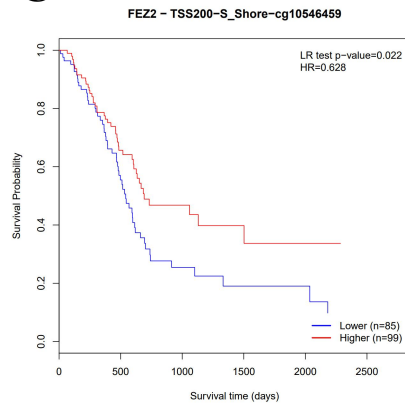

## D

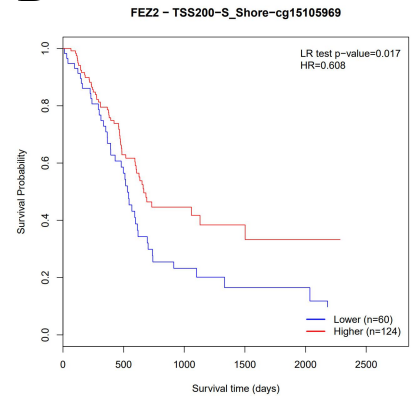

## E

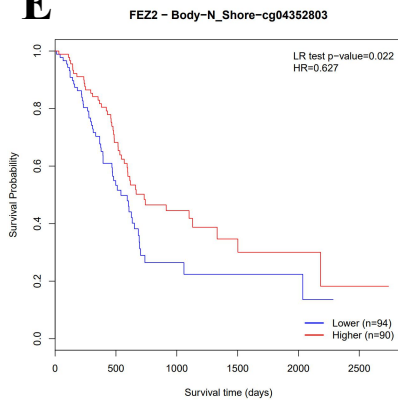

## F

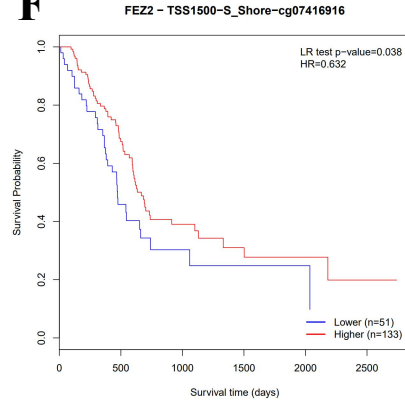

## G

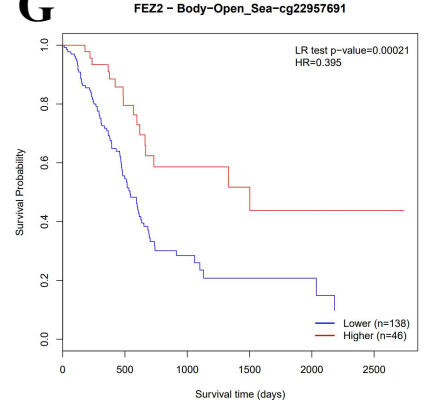

# Figure 3

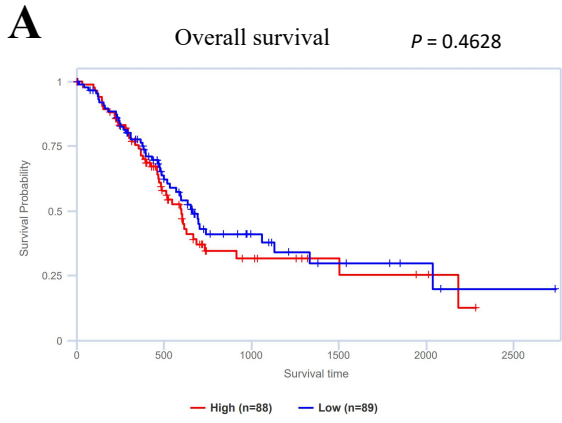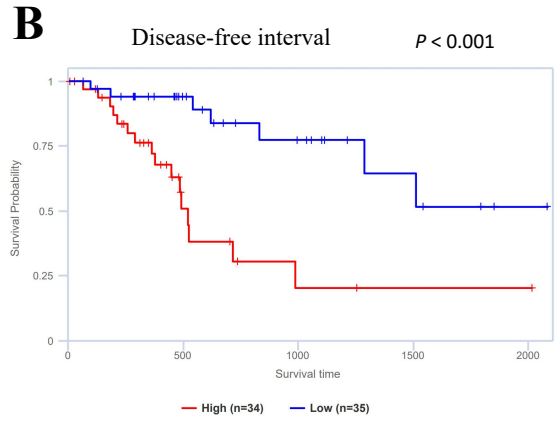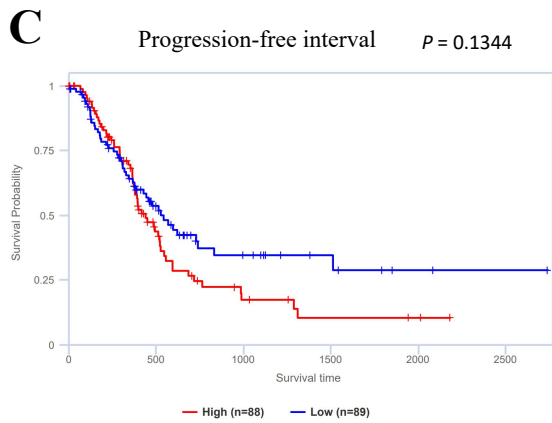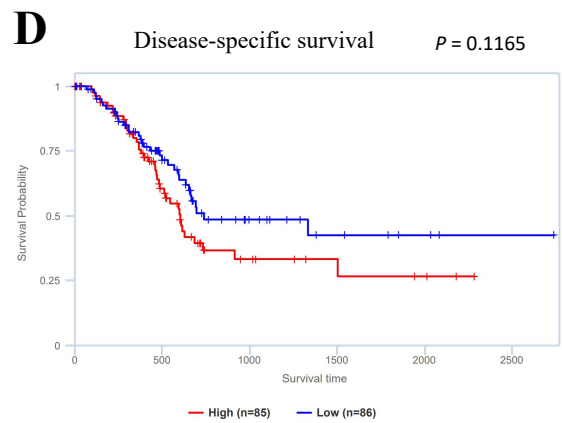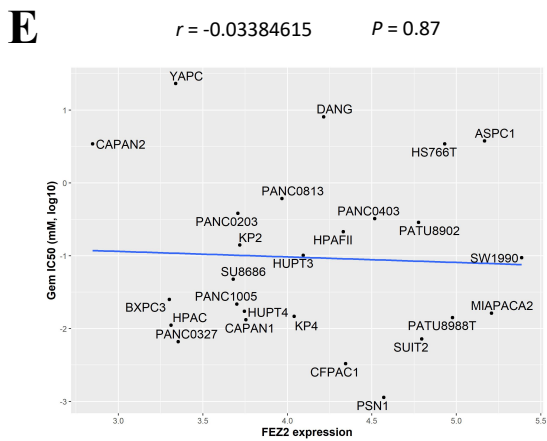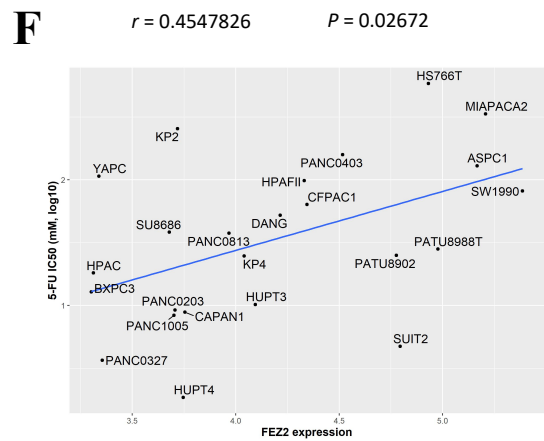

# Figure 4

## A

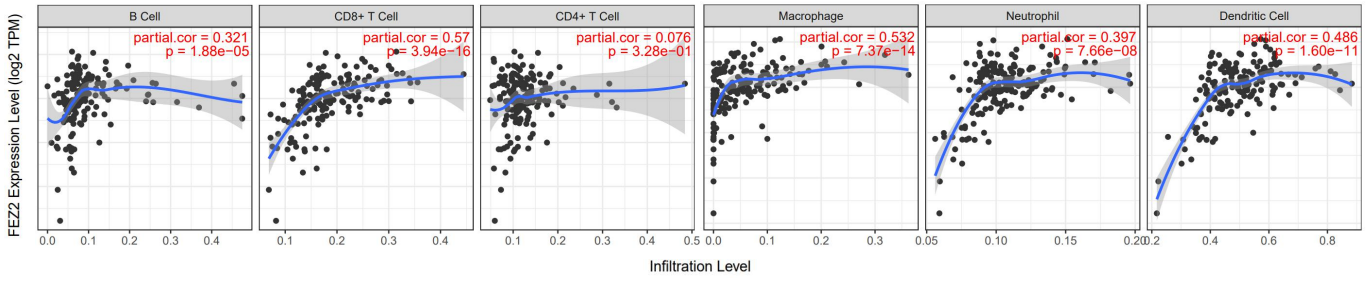

## B

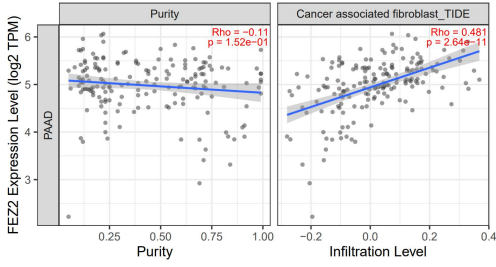

## C

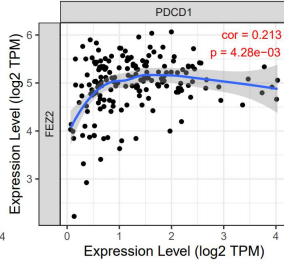

## D

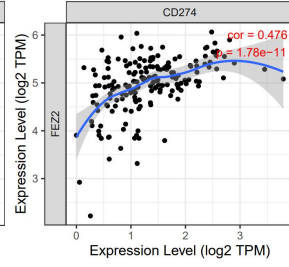

## E

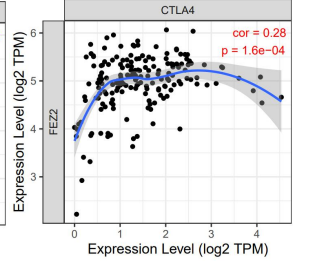

# Figure 5

## A

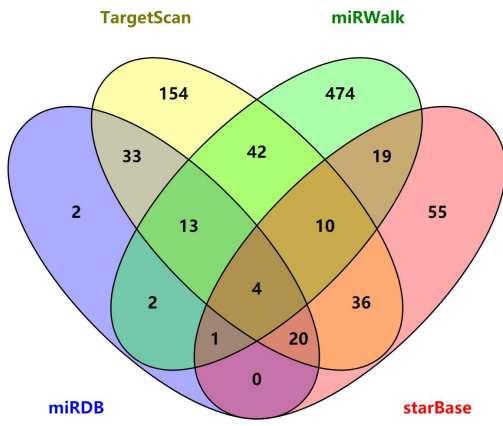

## B

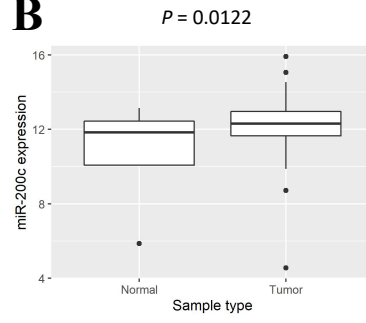

## C

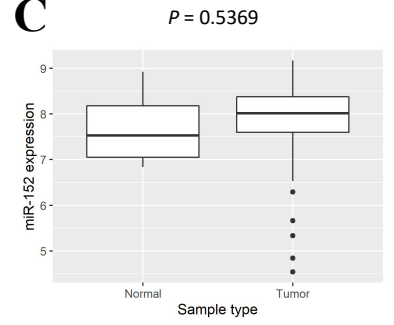

## D

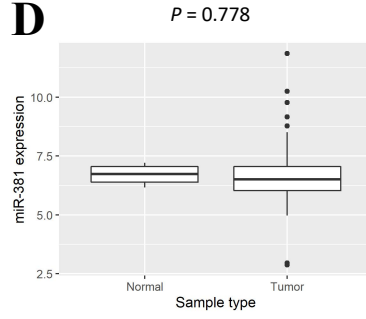

## E

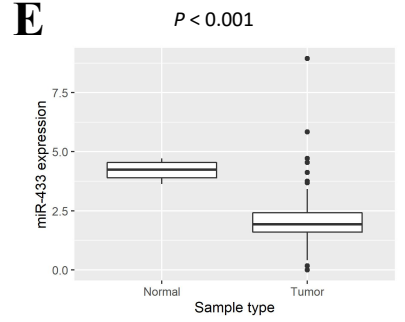

## F

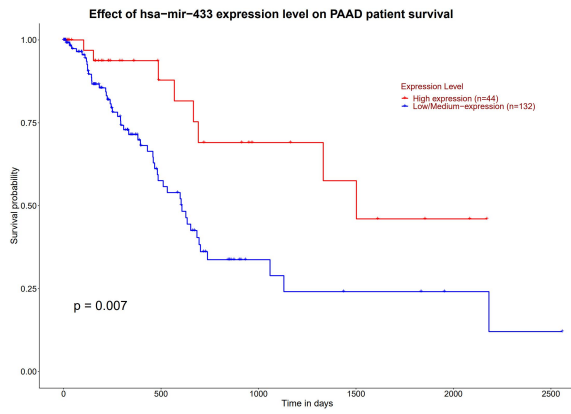

# Figure 6

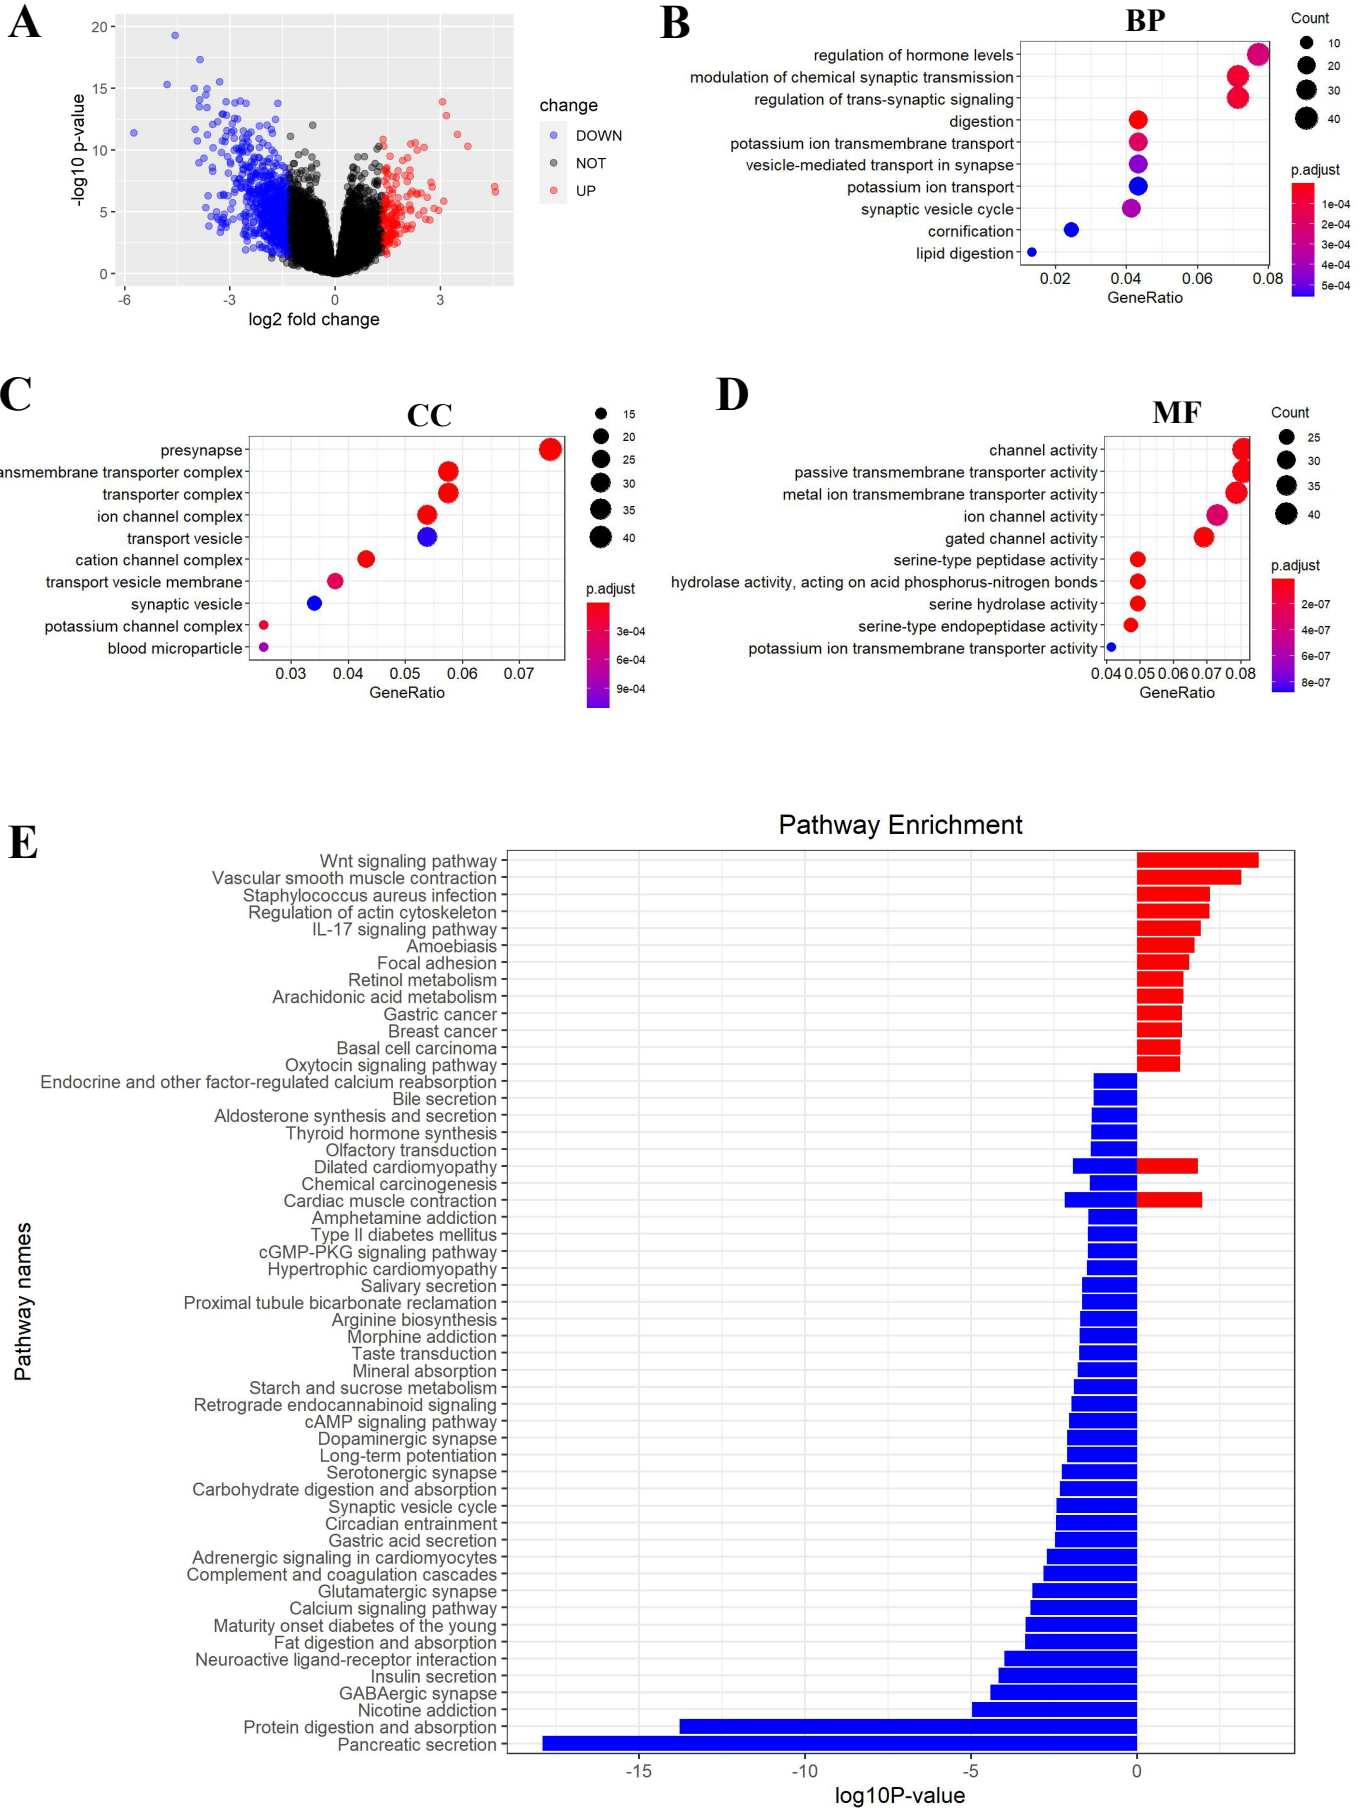



**Figure 7**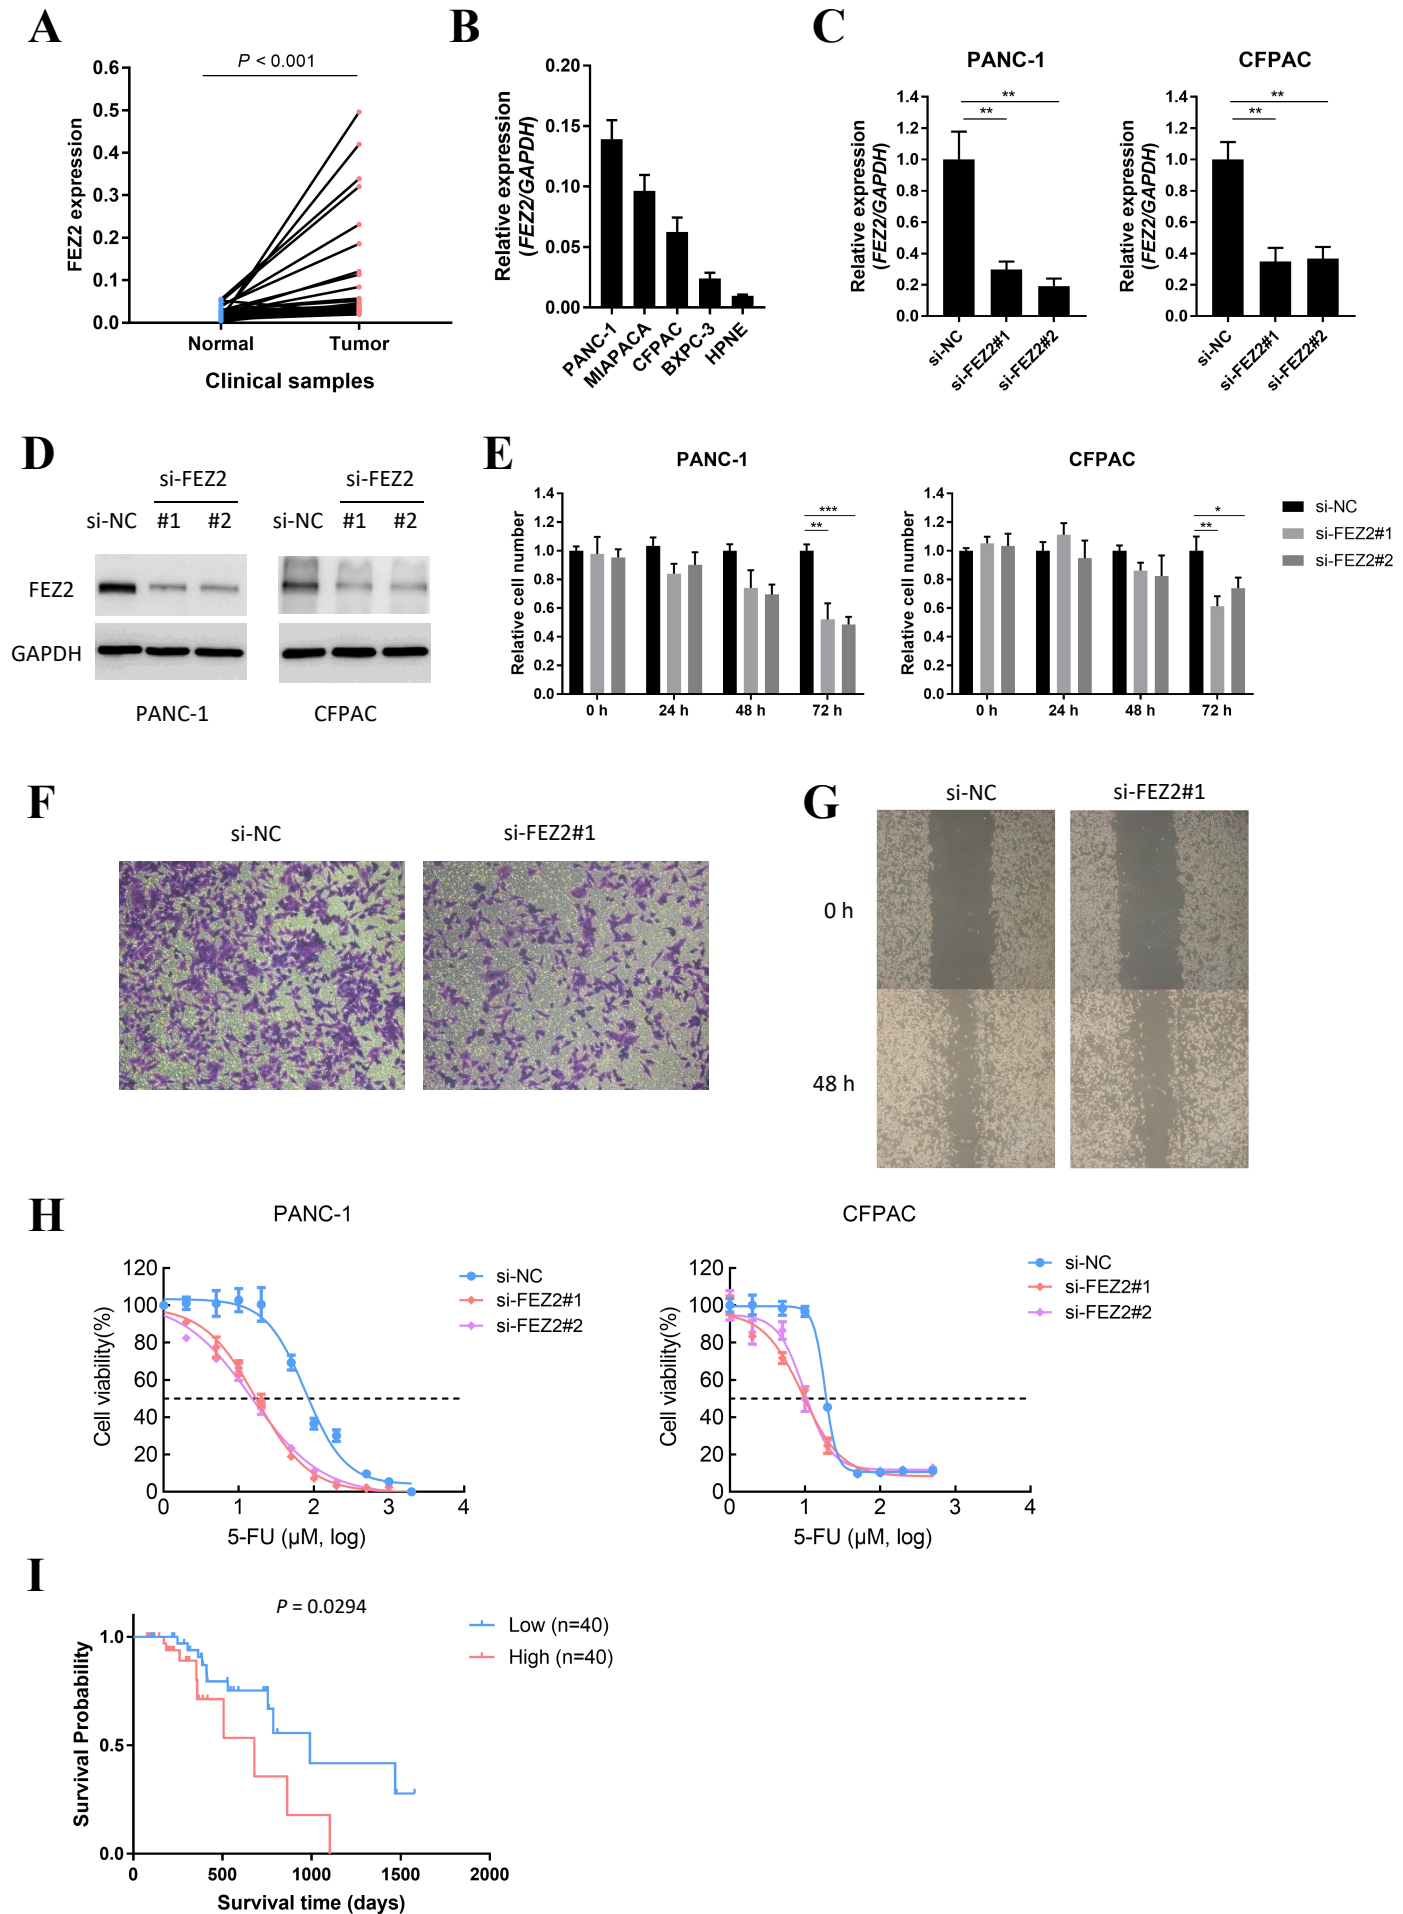

Supplement: Figure_FEZ2_20210705.pdf [file Figure_FEZ2_20210705.pdf]
