# Supplementary material for: Identification of FEZ2 as a potential oncogene in pancreatic ductal adenocarcinoma
Source: PeerJ journal article supplement (doi:10.7717/peerj.12736), 2022-01-05

# CFPAC

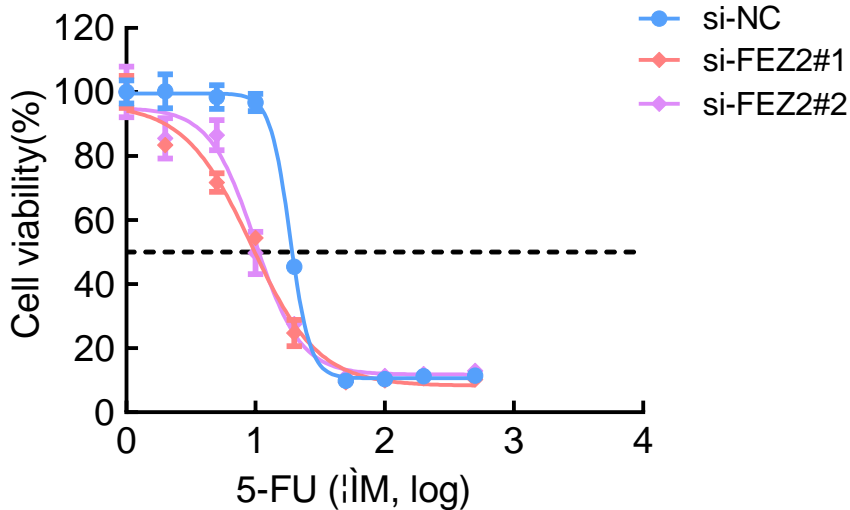

Supplement: cfpac_ic50.pdf [file cfpac_ic50.pdf]
