# Supplementary material for: Identification of FEZ2 as a potential oncogene in pancreatic ductal adenocarcinoma
Source: PeerJ journal article supplement (doi:10.7717/peerj.12736), 2022-01-05

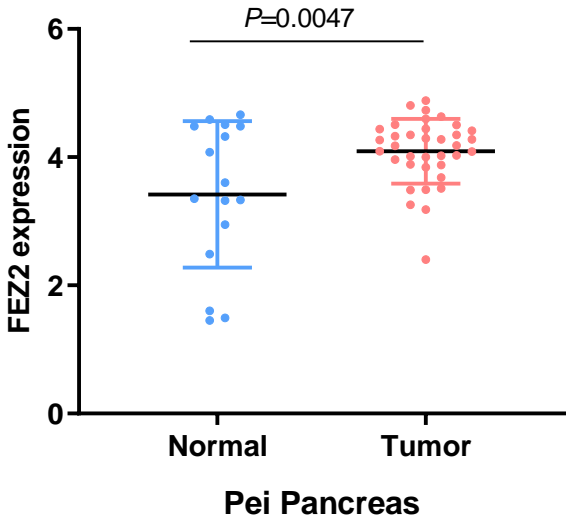

Supplement: pei_pan.pdf [file pei_pan.pdf]
