# Supplementary material for: Identification of FEZ2 as a potential oncogene in pancreatic ductal adenocarcinoma
Source: PeerJ. 2022 Jan 5;10:e12736. doi: 10.7717/peerj.12736 (PMC8742541; doi:10.7717/peerj.12736)
Supplement: Supplemental Information 6 [file peerj-10-12736-s006.xlsx]

## Sheet: Sheet1
PANC-1	0.150345	0.127994	0.133046
MIAPACA	0.087178	0.105792	0.058135
CFPAC-1	0.054201	0.07099	0.017315
BXPC-3	0.020721	0.027319	0.051794
HPNE	0.008936	0.010382	0.012516
