# Supplementary material for: Identification of FEZ2 as a potential oncogene in pancreatic ductal adenocarcinoma
Source: PeerJ. 2022 Jan 5;10:e12736. doi: 10.7717/peerj.12736 (PMC8742541; doi:10.7717/peerj.12736)
Supplement: Supplemental Information 7 [file peerj-10-12736-s007.xlsx]

## Sheet: Sheet1
Normal	Tumor
0.038147	0.23128
0.0408849	0.185915
0.0503352	0.320348
0.0293136	0.11326
0.00774624	0.49576
0.0204425	0.120551
0.0554646	0.338614
0.014455	0.419782
0.016141	0.025877
0.009809	0.029695
0.022313	0.034394
0.009466	0.034829
0.009058	0.036911
0.010618	0.025948
0.01298	0.031924
0.017271	0.025966
0.011612	0.038414
0.020489	0.042594
0.010127	0.035742
0.022087	0.021004
0.021238	0.084306
0.004231	0.036824
0.010392	0.045588
0.003226	0.035941
0.030202	0.057225
0.014267	0.020686
0.05233	0.022762
0.016872	0.038334
0.031245	0.051897
0.016605	0.036671
0.019113	0.02614
0.020167	0.020463
0.016602	0.041428
0.011871	0.023932
0.02567	0.035619
0.012137	0.024619
0.015377	0.029531
0.010246	0.041956
0.021217	0.024936
0.016117	0.024994
0.013189	0.042901
0.016095	0.023961
0.009367	0.019652
0.012215	0.019815
0.013657	0.023532
0.014893	0.041486
0.007844	0.020844
0.027257	0.040018
0.013339	0.023811
0.021077	0.019829
